# Supplementary material for: Growth and highly efficient third harmonic generation of ammonium dihydrogen phosphate crystals
Source: Royal Society of Chemistry journal article supplement (doi:10.1039/c6ra02283a), 2016-01-01

## Appendix

### §Appendix 1 Lattice parameters of ADP and KDP crystals

|     | a, b (Å) | c (Å) | Radius (Å)       |
|-----|----------|-------|------------------|
| KDP | 7.453    | 6.972 | $K^+=1.330$      |
| ADP | 7.502    | 7.546 | $[NH_4^+]=1.420$ |

### §§Appendix 2 Growth parameters of ADP crystals

| No. | Raw material | Seed type | Temperature reduction range (°C) | Crystal size (mm) |
|-----|--------------|-----------|----------------------------------|-------------------|
| 1   | A            | Z-plate   | 38.2~30.0                        | 50 × 47 × 87      |

### §§§Appendix 3 The crystal structures of KDP and ADP

#### Appendix 1 Figure

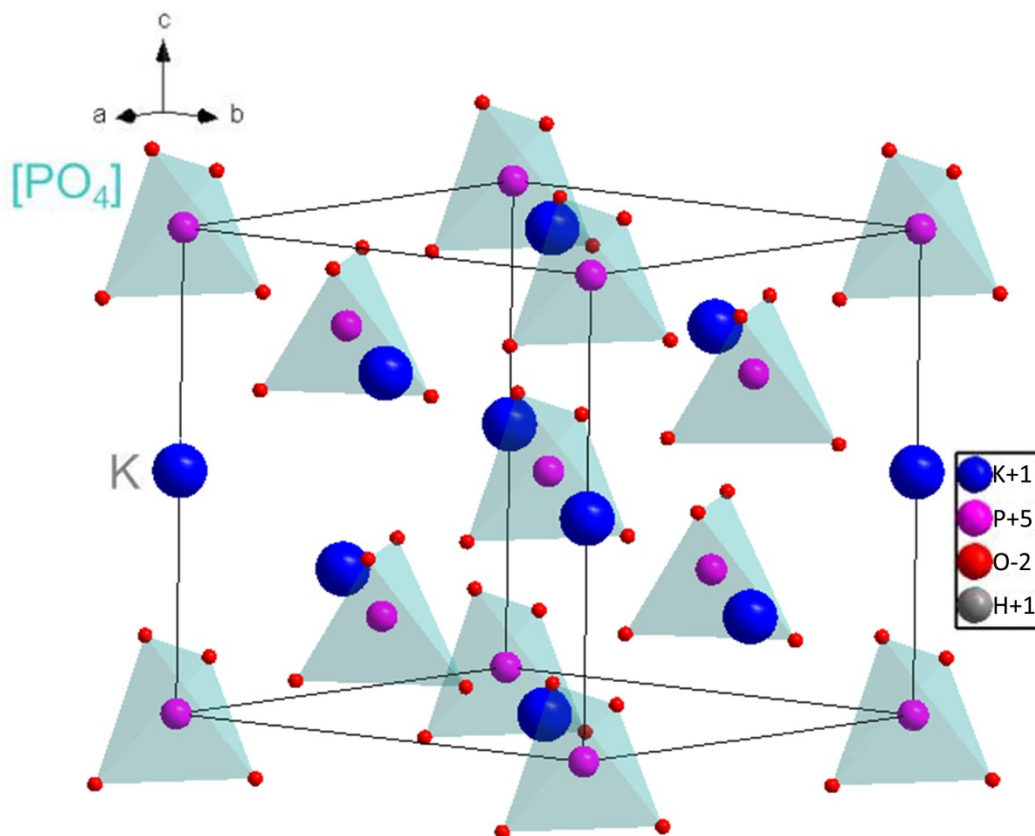

Appendix 2 Figure

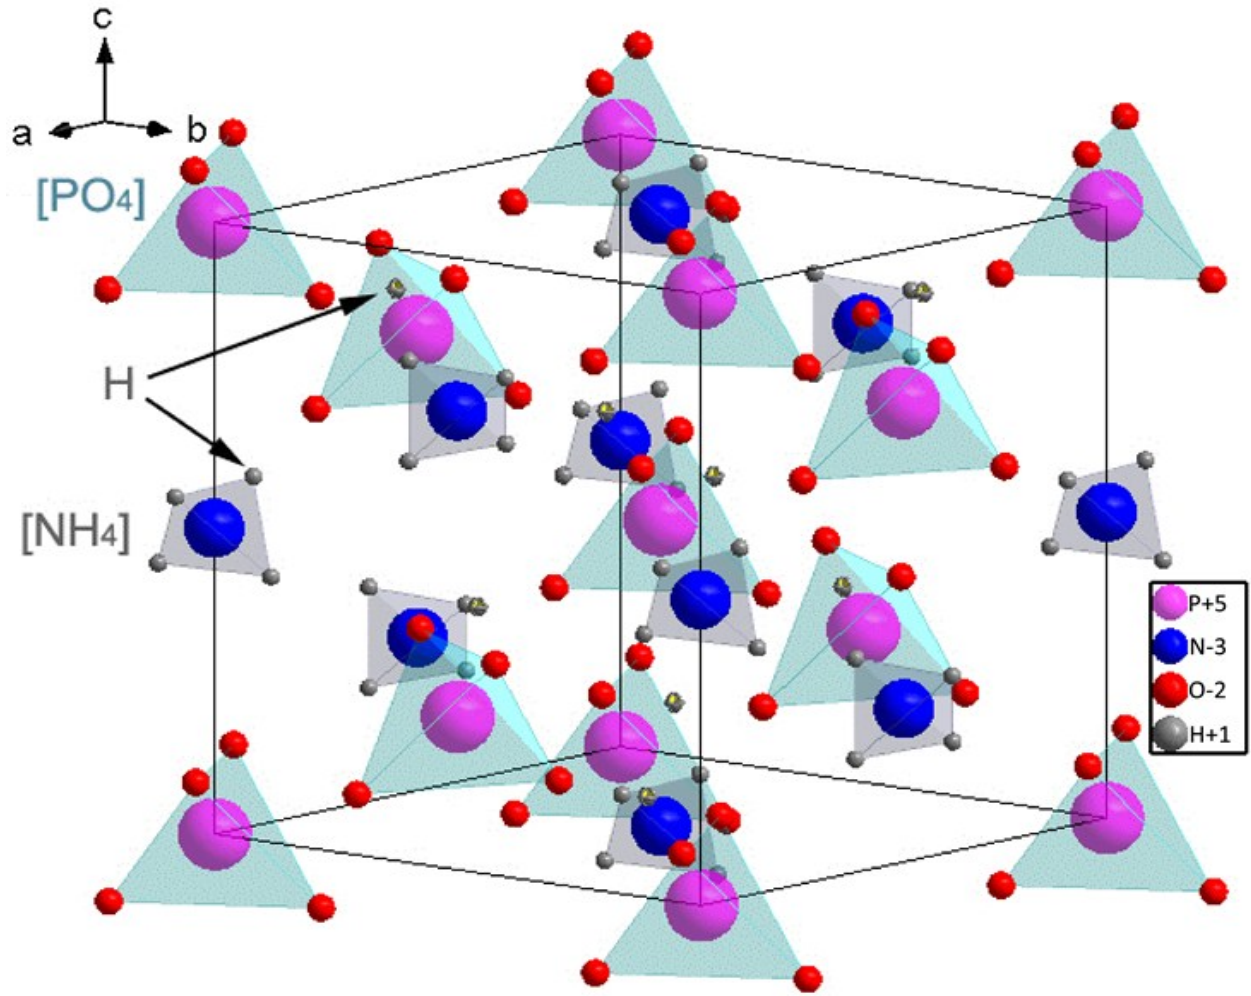

Supplement: c6ra02283a1.pdf [file c6ra02283a1.pdf]
